# Supplementary material
Source: HighWire-hosted journal article supplement (https://bmjopenquality.bmj.com/highwire/filestream/136112/field_highwire_adjunct_files/0/ds3757.docx)
Supplement: ds3757.docx [file ds3757.docx]

**Run Chart: Changes in Documentation of Indication, Management, and Co-morbidities in each PDSA cycle.**
